# Supplementary material
Source: Springer Nature journal article supplement (https://www.springermedizin.de/resource/supplementary/12885_2008_1219_MOESM1_ESM.pdf/9471446)

**Age of breast cancer onset (years)**

100  
80  
60  
40  
20

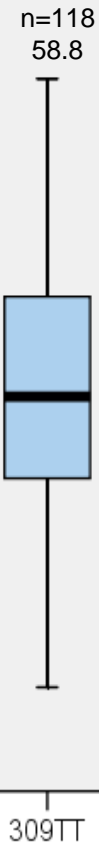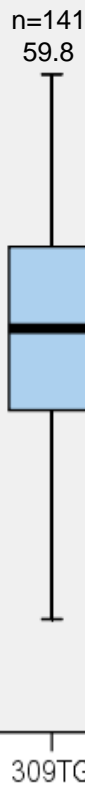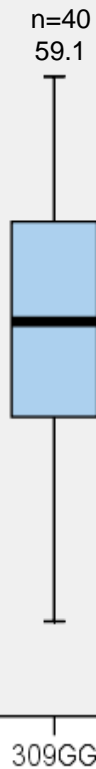

Supplement: MOESM1 [file 9471446]
